# Supplementary material
Source: publisher figshare collection journal article supplement (https://gsapubs.figshare.com/ndownloader/files/22757303)
Supplement: Supplementary file 1 [file 22757303]

**Table DR1.** References for numbered locations in Fig. 1: Initial occurrence of lithologic units as clasts in tectogenic conglomerates along Laramide uplifts.

| <b>number</b> | <b>location</b>                                                | <b>references</b>                                                                                                                                                    |
|---------------|----------------------------------------------------------------|----------------------------------------------------------------------------------------------------------------------------------------------------------------------|
| 1             | E Beartooth Uplift                                             | (Dutcher et al., 1986; DeCelles et al., 1991)                                                                                                                        |
| 2             | NE Bighorn Uplift                                              | (Mapel, 1959; Flores, 1988; Seeland, 1992; Hansley and Brown, 1993; Hoy and Ridgeway, 1997)                                                                          |
| 3             | SE Bighorn Uplift                                              | (Seeland, 1992; Hoy and Ridgeway, 1997)                                                                                                                              |
| 4             | NW Owl Creek Uplift                                            | (Krause, 1985)                                                                                                                                                       |
| 5             | NW Wind River Basin<br>(N Wind River and S Washakie Uplifts)   | (Love, 1939; Keefer, 1957, 1965; Winterfield and Conard, 1983; Winterfield, 1990; Perry and Flores, 1997)                                                            |
| 6             | SE Owl Creek Uplift                                            | (Love, 1964; Korth, 1982)                                                                                                                                            |
| 7             | NW Green River Basin<br>(N Thrust Belt and Gros Ventre Uplift) | (Dorr et al., 1977)                                                                                                                                                  |
| 8             | W Wind River Uplift                                            | (Berg, 1962; Martin and Shaughnessy, 1969; Steidtmann, 1969; Dorr et al., 1977)                                                                                      |
| 9             | S Wind River Uplift                                            | (McGee, 1983; Loen, 1986; Steidtmann and Middleton, 1986, 1991)                                                                                                      |
| 10            | N Granite Mountains Uplift                                     | (Van Houten, 1964; Soister, 1968; Boles and Surdam, 1971; Perry and Flores, 1997)                                                                                    |
| 11            | S Granite Mountains Uplift                                     | (Knight, 1937; Dickey, 1962; Stephens and Healey, 1964; Love, 1970; Pipringos and Denson, 1970; Schmidt, 1979)                                                       |
| 12            | SE Granite Mountains and Shirley Mountains Uplifts             | (Gill et al., 1970; Blackstone, 1975; Hansen, 1986)                                                                                                                  |
| 13            | Thrust Belt (Central Idaho-Wyoming Salient)                    | (Oriol, 1962; Oriol and Tracey, 1970; Hurst and Steidtmann, 1986)                                                                                                    |
| 14            | Thrust Belt (SW Idaho-Wyoming Salient)                         | (DeCelles, 1994)                                                                                                                                                     |
| 15            | N Uinta Uplift (W)                                             | (Hansen and Bonilla, 1954; Wiegman, 1964; Hansen, 1965; Culbertson, 1969)                                                                                            |
| 16            | N Uinta Uplift (E)                                             | (Powell, 1876; Hansen and Bonilla, 1954; Anderman, 1955; Wiegman, 1964; Hansen, 1965; Culbertson, 1969)                                                              |
| 17            | NE Uinta Uplift (W)                                            | (Powell, 1876; Sears and Bradley, 1924; Hansen and Bonilla, 1954; Bradley, 1964; Wiegman, 1964; Hansen, 1965; Roehler, 1965; Hansen, 1984; Crews and Ethridge, 1993) |
| 18            | NE Uinta Uplift (E)                                            | (Schultz, 1920; Ritzma, 1955a, b; Roehler, 1968)                                                                                                                     |
| 19            | Park and Sawatch? Uplifts                                      | (Ritzma, 1955a)                                                                                                                                                      |
| 20            | SW Uinta Uplift                                                | (Bruhn et al., 1983; Bruhn et al., 1986)                                                                                                                             |
| 21            | Thrust Belt (Charlston-Nebo Salient)                           | (Bruhn et al., 1983; Bruhn et al., 1986)                                                                                                                             |
| 22            | Sawatch and Gunnison Uplifts                                   | (Donnell, 1969)                                                                                                                                                      |
| 23            | North Park (Park and Front Range Uplifts)                      | (Hail, 1965)                                                                                                                                                         |

## References Cited

- Anderman, G.G., 1955, Tertiary deformational history of a portion of the north flank of the Uinta Mountains in the vicinity of Manila, Utah, *in* Anderman, G.G., ed., Green River Basin: Casper, Wyoming Geological Association, 10<sup>th</sup> Annual Field Conference, Guidebook, p. 130-134.
- Berg, R.R., 1962, Laramide sediments along the Wind River Thrust, Wyoming: American Association of Petroleum Geologists Bulletin, v. 46, p. 220-230.
- Blackstone, D.L., Jr., 1975, Late Cretaceous and Cenozoic history of Laramie Basin region, Southeast Wyoming, *in* Curtis, B.F., ed., Cenozoic History of the Southern Rocky Mountains: Geological Society of America Memoir 144, p. 249-279.
- Boles, J.R., and Surdam, R.C., 1971, Authogenesis of the Wagon Bed Formation, central Wyoming: University of Wyoming Contributions to Geology, v. 10, p. 141-144.
- Bradley, W.H., 1964, The geology of the Green River Formation and associated Eocene rocks in southwestern Wyoming and adjacent parts of Colorado and Utah: U.S. Geological Survey Professional Paper 496-A, 86 p.
- Bruhn, R.L., Picard, M.D., and Beck, S.L., 1983, Mesozoic and early Tertiary structure and sedimentology of the central Wasatch Mountains, Uinta Mountains and Uinta Basin, *in* Gurgel, K.D., ed., Geologic excursions in the Overthrust Belt and metamorphic core complexes of the Intermountain region; Guidebook, Part I: Utah Geological and Mineralogical Survey Special Studies 59, p. 63-105.
- Bruhn, R.L., Picard, M.D., and Isby, J.S., 1986, Tectonics and sedimentology of Uinta Arch, Western Uinta Mountains, and Uinta Basin, *in* Peterson, J.A., ed., Paleotectonics and Sedimentation in the Rocky Mountain Region, United States: American Association of Petroleum Geologists Memoir 41, p. 333-352.
- Crews, S.G., and Ethridge, F.G., 1993, Laramide tectonics and humid alluvial fan sedimentation, NE Uinta Uplift, Utah and Wyoming: Journal of Sedimentary Petrology, v. 63, p. 420-436.
- Culbertson, W.C., 1969, Facies changes in the Eocene rocks in the south-eastern part of the Green River Basin, Wyoming, *in* Lindsay, J.B., ed., Geologic Guidebook of the Uinta Mountains, Utah's Maverick Range: Salt Lake City, Intermountain Association of Petroleum Geologists, 16<sup>th</sup> Annual Field Conference, p. 205-211.
- DeCelles, P.G., Gray, M.B., Ridgway, K.D., Cole, R.B., Srivastava, P., Pequera, N., and Pivnik, D.A., 1991, Kinematic history of foreland uplift from Paleocene synorogenic conglomerate, Beartooth Range, Wyoming and Montana: Geological Society of America Bulletin, 103, 1458-1475.
- DeCelles, P.G., 1994, Late Cretaceous-Paleocene synorogenic sedimentation and kinematic history of the Sevier thrust belt, northeast Utah and southwest Wyoming: Geological Society of America Bulletin, v. 106, p. 32-56.
- Dickey, M.L., 1962, Upper Cretaceous and Cenozoic history of the Green Mountain-Whiskey Peak area Fremont County, Wyoming [M.Sc. thesis]: Laramie, University of Wyoming, 85 p.
- Donnell, J.R., 1969, Paleocene and lower Eocene units in the southern part of the Piceance Creek Basin Colorado: U.S. Geological Survey Bulletin 1274-M, 18 p.
- Dorr, J.A., Jr., Spearing, D.R., and Steidtmann, J.R., 1977, Deformation and deposition between a foreland uplift and an impinging thrust belt: Hoback Basin, Wyoming: Geological Society of America Special Paper 177, 82 p.
- Dutcher, L.A.F., Jobling, J.L., and Dutcher, R.R., 1986, Stratigraphy, sedimentology and structural geology of Laramide synorogenic sediments marginal to the Beartooth Mountains, Montana and Wyoming, *in* Garrison, P.B., ed., Geology of the Beartooth Uplift and adjacent basins: Billings, Montana Geological Society and Yellowstone Bighorn Research Association, Field Conference and Symposium, p. 33-52.

- Flores, R.M., 1988, The role of the Bighorn Uplift in the tectonic evolution of the Tertiary Powder River Basin: Geological Society of America Abstracts with Programs, v. 20, no. 6, p. 414-415.
- Gill, J.R., Merewether, E.A., and Cobban, W.A., 1970, Stratigraphy and nomenclature of some Upper Cretaceous and lower Tertiary rocks in south-central Wyoming: U.S. Geological Survey Professional Paper 667, 53 p.
- Hail, W.J., 1965, Geology of northwestern North Park, Colorado: U.S. Geological Survey Bulletin 1188, 133 p.
- Hansen, D.E., 1986, Laramide tectonics and deposition of the Ferris and Hanna Formations, south-central Wyoming, *in* Peterson, J.A., ed., Paleotectonics and Sedimentation in the Rocky Mountain Region, United States: American Association of Petroleum Geologists Memoir 41, p. 481-495.
- Hansen, W.R., 1965, Geology of the Flaming Gorge area Utah-Colorado-Wyoming: U.S. Geological Survey Professional Paper 490, 196 p.
- , 1984, Post-Laramide tectonic history of the eastern Uinta Mountains, Utah, Colorado, and Wyoming: The Mountain Geologist, v. 21, p. 5-29.
- Hansen, W.R., and Bonilla, M.G., 1954, Laramide faulting and folding on the north flank of the Uinta Mountains in eastern Daggett County, Utah: Colorado Scientific Society Proceedings, v. 17, no. 1, 29 p.
- Hansley, P.L., and Brown, J.L., 1993, Provenance of the Tullock Member of the Fort Union Formation, Powder River Basin, Wyoming and Montana: Evidence for Early Paleocene Laramide uplift: The Mountain Geologist, v. 30, p. 25-34.
- Hoy, R.G., and Ridgeway, K.D., 1997, Structural and sedimentologic development of footwall growth synclines along an intraforeland uplift, east-central Bighorn Mountains, Wyoming: Geological Society of America Bulletin, v. 109, p. 915-935.
- Hurst, D.J., and Steidtmann, J.R., 1986, Stratigraphy and tectonic significance of the Tunp Conglomerate in the Fossil Basin, southwest, Wyoming: The Mountain Geologist, v. 23, p. 6-13.
- Keefer, W.R., 1957, Geology of the Du Noir area Fremont County Wyoming: U.S. Geological Society Professional Paper 294-E, p. 155-221.
- , 1965, Stratigraphy and geologic history of the uppermost Cretaceous, Paleocene, and Lower Eocene rocks in the Wind River Basin, Wyoming: U.S. Geological Survey Professional Paper 495-A, 77 p.
- Knight, S.H., 1937, Origin of the giant conglomerates of Green Mountain and Crook's Mountain, central Wyoming: Proceedings of the Geological Society of America for 1936, p. 84.
- Korth, W.W., 1982, Revision of the Wind River faunas, early Eocene of central Wyoming. Part 2. Geologic setting: Annals of Carnegie Museum, v. 51, p. 57-78.
- Krause, M.J., 1985, Early Tertiary quartzite conglomerates of the Bighorn Basin and their significance for paleogeographic reconstruction of northwest Wyoming, *in* Flores, R.M., and Kaplan, S.S., eds., Cenozoic Paleogeography of the West Central United States: Denver, Colorado, Rocky Mountain Section, SEPM (Society for Sedimentary Geology), Rocky Mountain Paleogeography Symposium 3, p. 71-91.
- Loen, J.S., 1986, Sedimentology and gold placer deposits--Cathedral Bluffs Member of the Wasatch Formation, Dickie Springs-Pacific Butte area, Fremont County, Wyoming: U.S. Geological Survey Open-File Report 86-456, 15 p.
- Love, J.D., 1939, Geology along the southern margin of the Absaroka Range, Wyoming: Geological Society of America Special Paper 20, 134 p.
- , 1964, Uraniferous phosphatic lake beds of Eocene age in intermontane basins of Wyoming and Utah: U.S. Geological Survey Professional Paper 474-E, 66 p.
- , 1970, Cenozoic geology of the Granite Mountains area, central Wyoming: U.S. Geological Survey Professional Paper 495-C, 154 p.

- Mapel, W.J., 1959, Geology and coal resources of the Buffalo-Lake DeSmet area Johnson and Sheridan Counties Wyoming: U.S. Geological Survey Bulletin 1078, ??? p.
- Martin, W.B., and Shaughnessy, J., 1969, Project Wagon Wheel, *in* Barlow, J.A., ed., Symposium on Tertiary Rocks of Wyoming: Casper, Wyoming Geological Association, 21<sup>st</sup> Annual Field Conference, Guidebook, p. 145-152.
- McGee, L.C., 1983, Laramide sedimentation, folding and faulting southern Wind River Range, Wyoming [M.Sc. thesis]: Laramie, University of Wyoming, 92 p.
- Oriel, S.S., 1962, Main body of the Wasatch Formation near La Barge, Wyoming: American Association of Petroleum Geologists Bulletin, v. 46, p. 2161-2173.
- Oriel, S.S., and Tracey, J.I., Jr., 1970, Uppermost Cretaceous and Tertiary stratigraphy of Fossil Basin, southwestern Wyoming: U.S. Geological Survey Professional Paper 635, 53 p.
- Perry, W.J., Jr., and Flores, R.M., 1997, Sequential Laramide deformation and Paleocene depositional patterns in deep gas-prone basins of the Rocky Mountain region: U.S. Geological Survey Bulletin 2146-E, p. 49-59.
- Pipringos, G.N., and Denson, N.M., 1970, The Battle Spring Formation in south-central Wyoming, *in* Enyert, R.L., ed., Symposium on Wyoming Sandstones: Casper, Wyoming Geological Association, 22<sup>nd</sup> Annual Field Conference, Guidebook, p. 161-168.
- Powell, J.W., 1876, Report of the geology of the eastern portion of the Uinta Mountains and region of country adjacent thereto: U.S. Geological and Geographical Survey of the Territories Second Division, 218 p.
- Ritzma, H.R., 1955a, Early Cenozoic history of the Sand Wash Basin, northwest Colorado, *in* Ritzma, H.R., and Oriel, S.S., eds., Guidebook to the Geology of Northwest Colorado: Salt Lake City, Utah, Intermountain Association of Petroleum Geologists and Rocky Mountain Association of Geologists, 6<sup>th</sup> Annual Field Conference, p. 36-40.
- , 1955b, Late Cretaceous and early Cenozoic structural pattern, southern Rock Springs Uplift, Wyoming, *in* Anderman, G.G., ed., Green River Basin: Casper, Wyoming Geological Association, 10<sup>th</sup> Annual Field Conference, Guidebook, p. 135-137.
- Roehler, H.W., 1965, Early Tertiary depositional environments in the Rock Springs Uplift area, *in* De Voto, R.H., and Bitter, R.K., eds., Sedimentation of Late Cretaceous and Tertiary Outcrops, Rock Springs Uplift: Casper, Wyoming Geological Association, 19<sup>th</sup> Annual Field Conference, Guidebook, p. 140-150.
- , 1968, Redefinition of Tipton Shale Member of Green River Formation of Wyoming: American Association of Petroleum Geologists Bulletin, v. 52, p. 2249-2256.
- Schmidt, L.J., Jr., 1979, Geologic map of the Crooks Peak quadrangle, Fremont and Sweetwater Counties, Wyoming: U.S. Geological Survey Geologic Quadrangle Map GQ-1517, Scale 1:24 000, 1 Sheet.
- Schultz, A.R., 1920, Oil possibilities in and around Baxter Basin, in the Rock Springs Uplift, Sweetwater County, Wyoming: U.S. Geological Survey Bulletin 702, 107 p.
- Sears, J.D., and Bradley, W.H., 1924, Relations of the Wasatch and Green River Formations in northwestern Colorado and southern Wyoming: U.S. Geological Survey Professional Paper 132-F, p. 93-107.
- Seeland, D., 1992, Depositional systems of a synorogenic continental deposit-The upper Paleocene and lower Eocene Wasatch Formation of the Powder River Basin: U.S. Geological Survey Bulletin 1917-H, 20 p.
- Soister, P.E., 1968, Stratigraphy of the Wind River Formation in south-central Wind River Basin, Wyoming: U.S. Geological Survey Professional Paper 594-A, 50 p.
- Steidtmann, J.R., 1969, Stratigraphy of the early Eocene Pass Peak Formation, central-western Wyoming, *in* Barlow, J.A., ed., Symposium on Tertiary Rocks of Wyoming: Casper, Wyoming Geological Association, 21<sup>st</sup> Annual Field Conference, Guidebook, p. 55-63.

- Steidtmann, J.R., and Middleton, L.T., 1986, Eocene-Pliocene stratigraphy along the southern margin of the Wind River Range, Wyoming: Revisions and implications from field and fission-track studies: *The Mountain Geologist*, v. 23, p. 19-25.
- , 1991, Fault chronology and uplift history of the southern Wind River Range, Wyoming: Implications for Laramide and post-Laramide deformation in the Rocky Mountain foreland: *Geological Society of America Bulletin*, v. 103, p. 472-485.
- Stephens, J.G., and Healey, D.L., 1964, Geology and uranium deposits at Crooks Gap, Fremont County Wyoming: U.S. Geological Survey Bulletin 1147-F, 82 p.
- Van Houten, F.B., 1964, Tertiary geology of the Beaver Rim area Fremont and Natrona counties, Wyoming: U.S. Geological Survey Bulletin 1164, 99 p.
- Wiegman, R.W., 1964, Late Cretaceous and early Tertiary stratigraphy of the Little Mountain area, Sweetwater County, Wyoming [M.Sc. thesis]: Laramie, University of Wyoming, 53 p.
- Winterfield, G.F., 1990, Summary of Laramide depositional and tectonic events East Fork area, northwestern Wind River Basin and adjacent Washakie Range, Wyoming, *in* Specht, R.W., ed., *Sedimentation and Tectonics: Casper, Wyoming Geological Association*, 41<sup>st</sup> Annual Field Conference, Guidebook, p. 167-177.
- Winterfield, G.F., and Conard, J.B., 1983, Laramide tectonics and deposition, Washakie Range and northwestern Wind River Basin, Wyoming, *in* Lowell, J.D., and Gries, R., eds., *Rocky Mountain Foreland Basins and Uplifts: Denver, Colorado, Rocky Mountain Association of Geologists*, 34<sup>th</sup> Annual Field Conference, Guidebook, p. 137-148.
